# Supplementary material for: The intron in centromeric noncoding RNA facilitates RNAi-mediated formation of heterochromatin
Source: PLOS journal article supplement (doi:10.1371/journal.pgen.1006606), 2017-02-23

S3 Figure

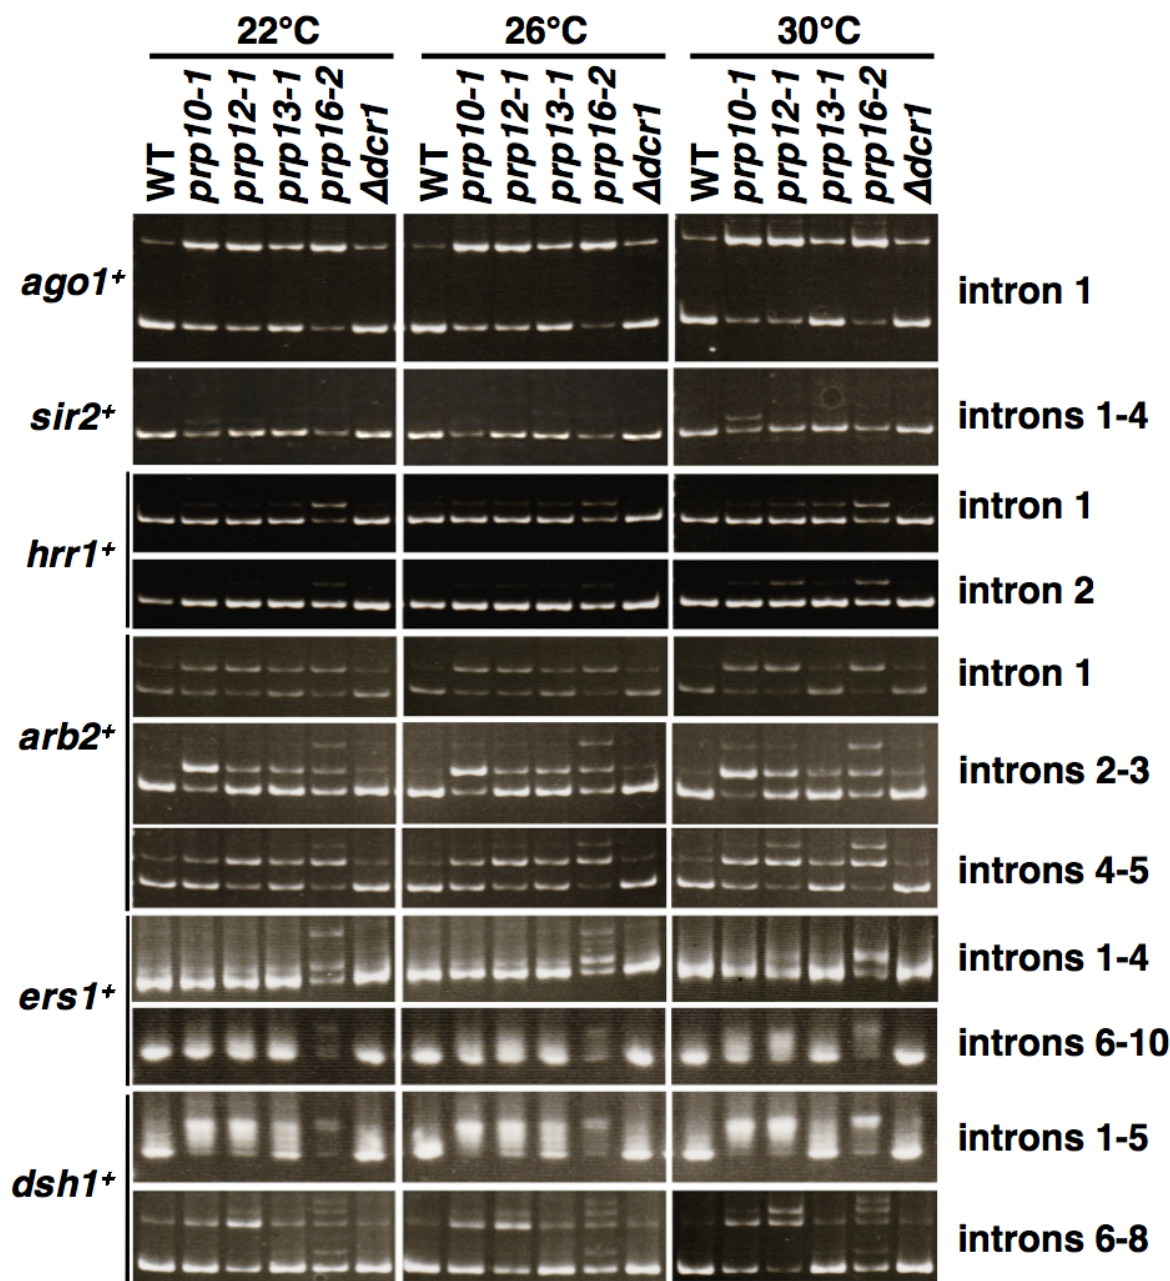

Supplement: S4 (10.1371/journal.pgen.1006606.s004) [file journal.pgen.1006606.s004]
