# Supplementary material for: The intron in centromeric noncoding RNA facilitates RNAi-mediated formation of heterochromatin
Source: PLOS journal article supplement (doi:10.1371/journal.pgen.1006606), 2017-02-23

S11 Figure

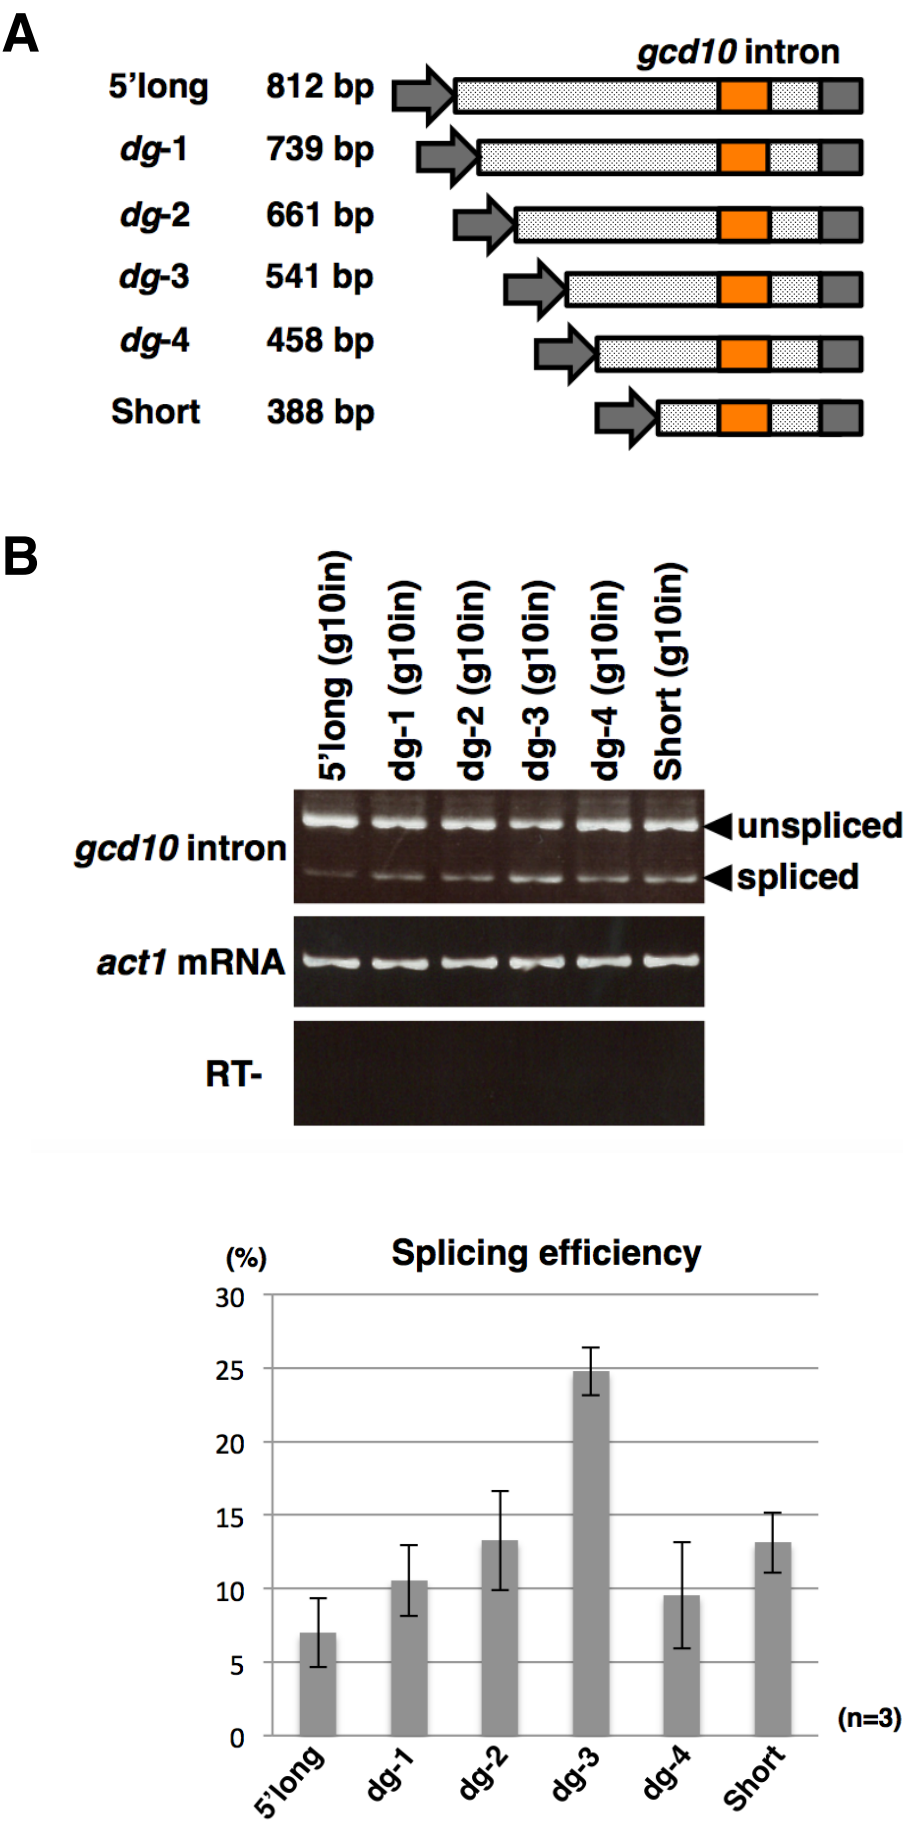

Supplement: S12 (10.1371/journal.pgen.1006606.s012) [file journal.pgen.1006606.s012]
